# Supplementary material for: QTL analysis uncovers the genetic architecture of resistance to chocolate spot disease caused by four Botrytis species on faba bean
Source: BMC Plant Biol. 2026 Apr 10;26:848. doi: 10.1186/s12870-026-08699-0 (PMC13173894; doi:10.1186/s12870-026-08699-0)
Supplement: Supplementary file 2 — Supplementary Material 2. [file 12870_2026_8699_MOESM2_ESM.xlsx]

## Sheet: Table S1
Table S1. SNP markers within the QTL regions with corresponding faba bean physical position, putative candidate genes, and corresponding DNA sequences.
Chromosme	SNP marker ID	Mélodie/2 × ILB 938/2 linkage map position (cM)	Physical map position (Mb)	Candidate gene	SNP marker sequence
1	Affx-310121849	254.285	580661775..580661845	Nuclear Protein DGCR14	TCTCTAACAGATGGAGACCTGGAAACCAAGCTCTC[A/G]TCTCTACCAAGTCTTGATACACTTCTAACTCTTGT
1	Affx-310243712	254.285	583873777..583873847	ND	GTAGCCCTTAGAGGCATTGCTGCCACATAAACTTC[C/T]TCTCTTCCCCTTGCAATTGTTGTGTTTGATAGTAG
1	Affx-1003936088	254.588	586068718..586068788	GTPASE Activating Protein GYP2	GTCCTGGTTAACGACTGTTACACAAACAACTTATC[A/G]GGATGTCATGTTGAACAAAGAGTGTTTAAAGATTT
1	Affx-1003950453	254.891	596296111..596296181	Protein Detoxification 45, Chloroplastic	TGGCCCACACTTACTTCGACTCAGAAATTCCCGCT[C/T]CGTAACCCTTCGTTTCTCTAAACCCTCGCCAAAAC
1	Affx-1003950454	254.891	596297326..596297393	Protein Detoxification 45, Chloroplastic	CATTTTTGAGGCTTTGGCTTTGTATTTGGGTTCTC[A/G]AACATTTCTTCGTTTGATTGGTGTATCAGCGGGAA
1	Affx-309357291	255.198	596427847..596427917	Phosphoglycerate Mutase Family Protein	ATTGTTCTTGAAAGCCTACCAGCAACATCCTTAAC[A/G]CTTTCACCTCCTTCTGGCCCAACAAAAGGATCTTT
1	Affx-1003947262	255.812	599706456..599706526	Epidermal Growth Factor Receptor Pathway Substrate Clone 15, Isoform A	AATGAGGAAAGCCGTGCTAATTACACTAGTGGCTG[C/T]CAGGATGAAAGCTTGGTCGAGCATATGAATAAGGA
1	Affx-1003935522	255.812	601587391..601587460	ND	TACAATGCACTTAAACTTGTTACAGTTGCACAGAG[C/T]AAGCGCGAACTCACTCCTGAAATGGTGAAAGCGGC
1	Affx-310409169	255.812	601078569..601082923	Chloride Channel Protein CLC-E	CCTTTCATCACCTCTCTTTGTCTGTACAGATGAAA[C/T]CCATGAAGACAAGCCTACTGCTCCAAGTAGGGGTA
1	Affx-1003927915	256.118	602484488..602487524	Protein Far1-Related Sequence	ATTTGCGTTTCTGTTTACCAGTATAGGGGTGATTG[C/T]AAGTGGTGATTTTCGAAGAATTACGTCCGAGGCTA
1	Affx-1003936786	256.118	603406094..603406164	Chaperone Protein DNAJ 10	AAAGCAGCGAGAAAGGCATCGGCTTGTTTCAATGA[A/C]GTGGCAAAGATTTGTTTCTCCTTGTCAGCGGCAGA
1	Affx-310002617	256.118	603953269..603962218	ND	CCTTATTATGTGTTGAAACGCTGGACAAGGAATGC[C/G]AAAACTGGTGTGTTGTTAGACCTACGCGCATCTGA
1	Affx-1003955716	256.118	603957057..603957127	Integrase, Catalytic Core // Ribonuclease H-Like Domain // Ribonuclease H Superfamily // Integrase Zinc-Binding Domain	CTTAAGTACATCTCTAAACACTTATTCAAGGCTTC[C/T]GATTGTCCATCCGTTTGAGGATGGTATGCTGTGCT
1	Affx-308919826	256.118	605619499..605619569	Heat Repeat-Containing Protein	ATGAACATAACTTTGGCTGAAGCAAAAAGAGTGGG[C/G]TCTCAATACCAAAGAGAAGCAGACAAATGTGTTGC
1	Affx-308739779	256.118	607114304..607115825	Purine Permease 5-Related	GTGAAGGAGAGCGAGTACTATGACGTGCTTGGTGT[C/G]AGTCCAAGTGCATCCGAAGCTGAGATTAAGAAAGC
1	Affx-1003957115	256.118	contig_6118	ND	CCACCTTCGAGGTAGTATCCATCCTGACAAGTAGT[A/G]TATTTGGAAAATTACATTGATGTCCCCAGTCATGT
1	Affx-1003955712	256.423	609902522..609902592	ND	GCTGGTGAGCTAGTGAGACTTCCTAGACAGCAATC[C/T]AGACTAACTACAGTTGTGCCTGATGAAGATAAGGA
1	Affx-1003926050	257.343	611991399..611991469	Heptahelical Transmembrane Protein 2	TCTTTGTTCCTTTCAATGGGATTTTCAGGTGTTAT[A/T]CCAGCAGTTCATGCTCTTGTAAGCAACTGGGGTCA
1	Affx-310267499	257.957	613711792..613711846	F-Box Protein PP2-B13-Related	GATTTGGGTTTTGCCGCTTCCGCTTTCGCCCACGA[G/T]TTCTGTTATTGATTTTGTGGGTACGCCGCCGTGGA
1	Affx-309827162	257.957	614560046..614560102	Lipase YOR059C-Related	GCTCACAGTACAATTCAGGTGAAAACGTACTGGCT[G/T]AATTCAGATGGTGCTGATGTGGTTTACCATATGAT
1	Affx-310697750	257.957	615213005..615213075	DNA-Repair Protein XRCC3 (XRCC3)	ACTGGAAAATAACATCCGATGACCATGCAGAACTA[A/C]TACAAGTTTCATGGTTGGAGGTATCTGGTAAAGTA
1	Affx-309424242	258.266	617352684..617352754	Serine-Threonine Kinase Receptor-Associated Protein (STRAP, UNRIP)	GTCAATGGGCCTGTTTGCCATATTCTGATGGTTCC[A/G]TCCTCAGATCCTGATGCATATGATTCTCCTCCAGG
1	Affx-1003944792	258.266	618230455..618230525	ATP-Dependent DNA Helicase Chr12-Related	GATCATAATGATGACACCGGTGATTTACTTGAAGG[C/T]CAGCGGCAATACAATTCTGCCATACACTGCATTCA
1	Affx-1003930557	258.879	621424681..621424726	ND	GATTTCTCAGTAGAGAATCAGTTTTTCTACAGAGG[A/G]TTTGTCATGTCGGCGAGGTTTGACGGTGAAAAAAA
1	Affx-309405496	258.879	621828984..621829054	DUF1005 Family Protein	GGAGCTTGGCTTATTATTCGACCCGATGGTGATGG[C/T]ACATGGAAGCCATGGGGTCGGCTCGAGGCTTGGCG
1	Affx-309405493	258.879	621829269..621829339	DUF1005 Family Protein	ATCGATTATGTTCCAGCAGCTAGAGATGGCTCTTC[A/C]GGCTATGTGA
1	Affx-309262933	259.184	625189498..625189558	Myosin Heavy Chain-Related Protein	CCATTTAGGGCTTCTGAAACACCAGAAACTGTACC[A/T]TCGGAAGTCACAGACTCCTTGACCTTCCAAAGAGA
1	Affx-1003920635	259.184	625680874..625680944	ND	TTGCTATTGGGATCAGCTAATAACTCCTTCAATGG[A/G]TCTTTTCGTACAAGAGCCTGCGGATCTGGATCTGA
1	Affx-1003945984	259.184	626868943..626869013	ND	CATGATACCGCTTTTATTAGTCCCTTTTATCAAAC[C/T]CTAGGTTTTTCGATCTGTATTTCTGATTACAACTA
1	Affx-1003917623	259.511	627930819..627930889	ND	GGGTTCCGCACCCGAGGACTGGAATTTATTTCCCT[G/T]TAGGCCATGACTGGGTAATGGAAGATGTTCCTGAA
1	Affx-309808953	259.835	630962918..630962988	DNA repair protein REV1	GTGATGGAAGAGCAGCTGGCTAGTGTTGGAGTTAA[A/T]TGTGGTGACGAAGATCTTGCAGGAAGTAATGGTGC
1	Affx-1003918030	259.835	630982466..630982536	ND	TCCAATACTAAGAGATAAATTTTCTGTATGTAGCA[C/G]CATTATTTTGCAACAGATATGGGTTATTTTTAGAC
1	Affx-1003955698	260.138	632726065..632726135	SANT/Myb Domain // Signal Transduction Response Regulator, Receiver Domain // Homeodomain-like // CheY-Like Superfamily // Response Regulator, Plant B-type	CCTGACATGGATGGGTTTAAGCTTCTTGAGTTGGT[A/G]GGACTTGAAATGGACTTACCTGTAATCAGTAAGTG
1	Affx-308815824	260.748	636279527..636279597	OS02G0797600 Protein	GGTGAAGAAGGAGGTTAGGGTTCATGATTTAACGG[A/G]GGGACTCTATGCAGGACCGACTGTTTCATCGCCTC
1	Affx-310044418	261.68	643077507..643077577	ND	TAATAACAGCATTGCATAGAAGAAAATACAAATCT[A/G]GCATAAGCTCCAAGAGCCTCCTAAAGATTAAAAAG
1	Affx-310638103	261.68	642328668..642328738	Nodulin-Like_MFS Transporter	TTTGAAACTCTTTTAGGATACAATGTCATCTTTAC[A/C]GGGACGGCAATTGGAGCCATGAGAAAGAGAACCAT
1	Affx-1003917954	261.68	644744880..644744950	Protein PHOX3	TTGAAATTGATAATGCTCCTAAGAATGACTGGGTG[A/G]TGAAATTAAACGAAATTATTAGCCCATCTTGTGTT
1	Affx-1003914993	262.297	647711816..647711886	Leucine-Rich PPR Motif-Containing Protein, Mitochondrial (LRPPRC)	GGGGAGAATGGAGGATGCTGTTAGGATTCGAGATG[A/T]GATGTTGAGGGTTGGATTGAAGATGAATATGGTTA
1	Affx-1003944811	262.6	652181508..652181578	Cytochrome-C Oxidase / Warburg's Respiratory Enzyme	GCTCGTTGCTTTCATTCCTTGGTTATAACACGTGG[C/G]TTTGATTGGAATACTGTTGTTACTTGTTCGTTGAT
1	Affx-1003957158	262.903	663265781..663265851	Serine Proteinase-Related	TCGGGAAAAGACCCAACCAAAGTTGACAGAAGTGG[A/T]GCCTACATTGTAAGACAAGCTGCGAAGAGTATTGT
1	Affx-458762328	262.903	664174679..664174749	S-Adenosylmethionine Synthetase	CTTAACCAACTCTAATGAAACCTCCTCTAAGCTAG[A/C]TGAGAAAAAAACACCAGCAAAACAGATAGCCATGT
1	Affx-1003935190	262.903	655570642..655570712	Solute Carrier Family 12 (Potassium/Chloride Transporter), Member 4/5/6 (SLC12A4_5_6, KCC)	GAATCCCAAGATGTTGAAGAACTTGAAAAGAGATT[A/G]GCTTCTCTCCGAAGAATATAA
1	Affx-310606040	262.903	657144361..657144431	Acidic Repeat-Containing Protein	GCAGGTTATTAACGGACACGTCTCTTTGTAGGTTA[C/T]GATGATTACATGTCATTTTTATGTGGCATCAATGG
1	Affx-1003944616	262.903	659480436..659480492	Charged Multivesicular Body Protein 2B	TCGGTGGTGACGGCTTCACCCAATCCTCCGACGAA[A/T]ATTCTCACAGCTCTCTTCTCGATTTCTTCTTCCTC
1	Affx-310384286	263.208	No faba bean hit!	Transcription Factor SBP Family-Related (Medicago trancutala)	GAAGACCCATGTTTAACAACGCACGCTCGGCAGAG[A/G]TATGTTCTCCGGTATCAACTTCACCTTCAAAGATA
1	Affx-1003922297	263.517	contig_3125	ND	TTATTGTTGCCTACAATCAGCTATAATTAATGGGT[A/G]TTGTGTGATAATGTTCATGGCAGATCGTTGTGAGA
4	Affx-1003943377	65.7049	823828686..823828756	DUF547 Domain-Containing Protein	TGTATTCCTTACTTCACATGAAAGACATGATTTCT[A/G]TCTGCTCACAGCCTTTCGTGAATGAGATATATGCG
4	Affx-1003926508	65.7049	825193185..825193255	Transmembrane Protein 131 Homolog	GGCTTGAAGAACAAGTTGTGAATTTCAGGCAAGGT[C/T]TATATCAAGAAGCTGTGTACATTTCATCTAAAAGA
4	Affx-1003923370	66.0194	832324878..832324942	Cyclin-Dependent Kinase Inhibitor 7	GTTATAAGGAGAAGAGAGATGAGTCTGTTAAGCGA[A/G]GAAGAAGAGGTGGGTTCCATTGAGAAGAAGCCGCA
4	Affx-1003941565	66.0194	836161212..836161265	Zeaxanthin Epoxidase (ZEP, ABA1)	TGGTGCCTTCTTCGTAACTGATTTGCGAAGTGAAC[A/G]TGGCACCTGGATCGTTGACATTGAAGGAAAGCGAT
4	Affx-310475179	66.6291	842619535..842619605	Caffeoyl-COA O-Methyltransferase	TACTATGAGTTGGGATTGCCTATAATTGAAAAGTC[C/T]GGAGTTGTTGACAAGATTGATTTCAGAGAAGGACC
4	Affx-1003957458	66.934	842991634..842991704	PI-PLC X Domain Plant-Like Protein	CAGCGTGTTGAGGAGCTTCTAAAGTGTTACTGGCC[A/T]GGTAAATCAGGTGAGAACTAACTATTAAAATAATG
4	Affx-308625565	66.934	842991634..842991704	PI-PLC X Domain Plant-Like Protein	TCTGCTGCTACGGATTGTGGGTCGGGTCTTTTTTG[C/T]GGTAATTGTCCTGCTTTGGGATTGAACCAACCCAT
4	Affx-1003930617	66.934	843332743..843332807	OTU Domain-Containing Protein	CAGGTGGATGCTCTGGGCCTTCGCATTCTTGAAGT[G/T]ACAGCAGATGGTAATTGTTTCTTCAGATCCCTTGC
4	Affx-1003931626	66.934	NN	ND	CCACTTCGTGGTACACATTCCCATGCCTTCGTTAG[C/T]TCATATATGAGCCTTGATGAGATTACAGACAAATC
4	Affx-309667194	67.8543	848938025..848938095	WRKY Domain-Containing Protein	AAGTGTTGAAGAAGGCTAAAGATGAAATCGATACC[A/G]ACATAGGACAAGATCACTTAGTAGAAGAGTCAGAC
4	Affx-1003914471	67.8543	863489556..863489626	Isoflavone 2'-Hydroxylase / Isoflavone 2'-Monooxygenase	TTCTTGCAAATGCCCGGCTCGACCAAGTAGATTAA[C/T]CATACACCCAAAATGCTCAACCCTTGGTTCCATCT
4	Affx-310697345	67.8543	NN	Tetratricopeptide-Like Helical Domain	TTGTTGGGATTTGAGGGTGAGAAGGAAGAGGAAGA[G/T]GAAGAGTTTTGATACTTATGGCGTGCTTGGGAGAG
4	Affx-310603675	67.8543	863458447..863458517	ND	TTCTATGTTTTAGTTCTAATCTTCTTCGCGGTTTT[G/T]GCTGCTACTAGGCCTTGCTTTGTAAGCTCTAGAAT
4	Affx-1003953071	68.8221	867767899..867767969	PTHR13683:SF906 - Eukaryotic Aspartyl Protease Family Protein	CCGGAATCAAGCTTAGCAAGCGAGGTTGTTGTCGG[A/G]GTTTTAGATACCGGTATTTGGCCCGAAAGCAAAAG
4	Affx-310431874	68.8221	870451214..870451284	Subtilisin-Like Protease SBT1.7	CTGTGCTGAGTTATGGGAAAGACTGCAGATATCCA[C/T]GGCCCCACCGCCAACGCTTCCAAATACAGAAGCAA
4	Affx-1003919466	69.1289	871145824..871145894	ND	ATAAGCCATCTATCCATCTTTCATTCGTTATTCTA[C/G]TTTTCCGCTCACATCAGTCTCTCCTCCTTGATAAG
4	Affx-1003950739	69.1289	871158002..871158062	Casein Kinase II Subunit Alpha-1	GTATCTCCAGAGGCAATCGATTTTCTTGATAAGCT[A/C]CTTCGTTATGACCACCAGGACAGGCTAACAGCAAG
4	Affx-308544852	69.1289	871147729..871147799	ND	TTGCACTTTCGCAAGGGAAAAACACACAAATCCCT[C/T]GTCTTTTACTAGCCACCAAGACAAACATAGACGCA
4	Affx-1003954440	69.7462	874868586..874868656	Peroxidase 35-Related	TAAATTACCTGAACAAAACAATCGTGAAAGAAGAG[A/T]CGGAGAGTAGCAGGAATGGTTACAAAAGTCTGTTG
4	Affx-310767822	69.7462	874870545..874870615	Peroxidase 35-Related	ACATTCGACAATATTTATTACCAGAATCTTCAACA[A/G]GGAAAAGGTTTATTCACTTCAGACCAAATCCTCTT
4	Affx-1003927146	70.3597	875989018..875989088	Scarecrow-Like Protein 32	GCTTTCAAACCCTTCTTCTTCCATGAACAAAAACA[A/G]TCAAATACCAACTAAACCATGGTTCCCAACTTCCA
4	Affx-1003952185	70.6664	886545242..886545312	Uncharacterised Conserved Protein UCP031279	GGATGTCCCACGCAGTTTTACTCTCTTCCAAGGAG[C/T]TTCAGTGTTAACTCTACTACAAGCGAGGACGATTT
4	Affx-1003926769	71.5924	895627410..895627480	Pectin Methylesterase CGR3-Related	AACAACATGAAAAATATCTTGCATGTTGGCCCAGA[G/T]AGTTGTTCAGTAGTATCAAAATTGTTAAGAGAAGG
4	Affx-458762419	72.8349	898866174..898866244	ND	ACTGAAAAAAGCGATTCCAAGAAGCTAATAATAAT[C/T]AACAGAGAATTTCGAAAATATCGAAGCGCGGTTAG
4	Affx-1003923978	73.1397	903903897..903903967	Transmembrane Protein	AATCCTCATGTGAAGGAAACTTCTGTTATAGATGC[A/C]AGACACAAGGAAGACGAGGAGGAAGATGAACAAGA
4	Affx-1003923795	74.0657	913104050..913104120	AT-Hook Motif Nuclear-Localized Protein 23	CTTATGAGAGGCTTCCTTTGGATGAAGAGGAACAG[C/G]TTCAGATGCAGCAAGTTGCTGGCGGTGGTGGTTCT
4	Affx-1003945904	75.0033	916061607..916061677	Ring_U-Box Superfamily Protein	ATTGACAACTTGAGTCTTATTCTACGCGGAACTGC[C/G]TTAAGTGATATTAGAAATGGAGATGATGTGCACAT
4	Affx-308851076	75.0033	916066283..916066353	Ring_U-Box Superfamily Protein	GTTGAGGAGTCCTTAGCTTTAGATGGTACTCAAAC[C/G]GAAGATGCAATCAAGTTGGGGAATCCGGGTCCTGC
4	Affx-310663967	75.0033	917719513..917719583	TLDc Domain	AATGGGGATTATCCGACGAATAGGATATTGAATTG[C/T]GGTCCGGACTTGCAAAGAGAGATTGAATTTCCGAA
4	Affx-309363946	75.0033	917818062..917818132	Saysvfn Domain-Containing Protein 1	AGAGAATGCATTATATGTATGAAAGATGAGGTCTC[C/T]GTTGTTTTCTTGCCATGTGCTCACCAAGTCATGTG
4	Affx-1003932137	75.0033	918443852..918443922	Protein Phosphatase 2C 32	GTGCTTCTATATCCCTCAGGGTTAAATGCACCAAA[C/T]TTGAAAGAGTTGTTTGTGTAGCCTATTATTACACA
6	Affx-309940433	107.635	997079424..997079494	AP2/ERF Domain Superfamily	TTGTTCCTAGTCCTGGTACGGAGAATGTCAAGGAC[A/G]AGAATTTGAATCAAGAGATGCAAATGGAAACAACA
6	Affx-310132563	108.878	1003136722..1003136792	4-Methyl-5(B-Hydroxyethyl)-Thiazole Monophosphate Biosynthesis (thiJ)	TCTGCTACACTTCTCGCTCTTCCATTCCCAAATAA[C/T]TTGCTCACAATAGCCAAAGCAAAATCAGTTATACT
6	Affx-310668794	108.878	1003707539..1003707595	Thioredoxin M3, Chloroplastic	GGAGTCTCACTTTTCAGAATCGAGTTATCCCACAG[A/G]TCTTTGTTAACTGGTGTAGCTCTGGTTTGTTGAAG
6	Affx-1003931890	109.185	1010859818..1010859888	ND	GCAAAAATTTGTGGATGCTTTGGGACAAAATTCAC[A/G]CCTAATTCCAACAACACACAGCAGTTGAAACTCTT
6	Affx-1003936109	109.185	1013560259..1013560329	Zinc/Ring Finger Domain	TTGACAGAAATGGTGCTCGAGTTGCTAGAAGGCCT[C/G]CCGGGCAAGCTAACCGTAATGTTAATGGTGATGCA
6	Affx-1003931889	109.185	1010862842..1010862912	ORF490 Protein	TTGCTTTATTGTTAACAAAGTGTGTCGGTTCATGG[C/T]AATCATTGCTTGGTGGGCCAAGAAGCAACCAGATA
6	Affx-1003944369	109.491	1016461575..1016461645	Glycosyl Transferase	CCTGTGAAGAAAGATGTTGTAGAGAAAGCAGTGAA[A/G]AGGATCATGGTTGGAGATGAAGCAGAGGAAATGAG
6	Affx-310049351	110.417	1018443738..1018443808	Leucine-Rich Repeat Domain Superfamily	TTTTTGAAGGATTGAATGATTGAGAAAACTAATTC[C/G]AGTCTTTGATCTAAGAAGTTTAATAGGTCAGGGAC
6	Affx-458762323	110.724	1018640608..1018640678	Leucine-Rich Repeat Domain Superfamily	AATTTCGGTTCCACTCCTGCAAGGTACTTAACTTT[C/T]GCACACAACAAATTCGTCGGTGAAATTCCTAGAAG
6	Affx-1003921273	111.031	1019905736..1019905806	U-box Domain-Containing Protein 10-Related	GCCATAAGAGCAGGAATCATCACAGCACTGTTGAA[A/G]ATGCTCACAGATTCAAGCAAATCAATGGTTGACGA
6	Affx-1003944167	111.957	1025011643..1025011713	Hydroxyproline-Rich Glycoproteins	TTCTACTACAAAAATCCTCCTAACAAACCTGATGA[C/T]TCTCCAGCATCATCGATCATTAAGGAGAAGAAATT
ND: Not determined.
